# Supplementary material for: Comparative Analyses of the Complete Mitogenomes of Two <em>Oxyria </em>Species (Polygonaceae) Provide Insights into Understanding the Mitogenome Evolution Within the Family
Source: Preprints.org preprint supplement (doi:10.20944/preprints202410.1049.v1), 2024-10-15
Supplement: Supplementary file 1 [file supplementary]

## Sheet: Contents
Supplementary Tables (Tables S1-S10)
Contents	(Click on hyperlink)
Table S1	The Sizes and structures of reported mitogenomes in Polygonaceae
Table S2	The simple sequence repeats (SSRs) SSRs in the mitochondrial genome of Oxyria digyna chromosome 1
Table S3	The simple sequence repeats (SSRs) SSRs in the mitochondrial genome of Oxyria digyna chromosome 2
Table S4	The simple sequence repeats (SSRs) SSRs in the mitochondrial genome of Oxyria sinensis chromosome 1
Table S5	The simple sequence repeats (SSRs) SSRs in the mitochondrial genome of Oxyria sinensis chromosome 2
Table S6	The tandem repeat sequences in the mitochondrial genome of Oxyria digyna chromosome 1
Table S7	The tandem repeat sequences in the mitochondrial genome of Oxyria digyna chromosome 2
Table S8	The tandem repeat sequences in the mitochondrial genome of Oxyria sinensis chromosome 1
Table S9	The tandem repeat sequences in the mitochondrial genome of Oxyria sinensis chromosome 2
Table S10	The dispersed repeats identified in the mitochondrial genome of Oxyria digyna chromosome 1
Table S11	The dispersed repeats identified in the mitochondrial genome of Oxyria digyna chromosome 2
Table S12	The dispersed repeats identified in the mitochondrial genome of Oxyria sinensis chromosome 1
Table S13	The dispersed repeats identified in the mitochondrial genome of Oxyria sinensis chromosome 2
Table S14	The homologous DNA fragment in the Oxyria digyna mitochondrial genome
Table S15	The homologous DNA fragment in the Oxyria sinensis mitochondrial genome
Table S16	The collinearity information between mitochondrial genomes
Table S17	Pairwise dN/dS ratios in different mitochondrial genes of Oxyria digyna and Oxyria sinensis and 8 closely related species

## Sheet: Table S1
Table S1: The Sizes and structures of reported mitogenomes in Polygonaceae
Species	Total size, bp	Chrromosome structures	Chromosome numbers	Genes numbers	Accession number
Fallopia multiflora	312450	Circular	2	57	MF611850~1
Fagopyrum esculentum	404063	Circular	10	54	MT318701~10
Rheum palmatum	302993	Circular	1	56	OR148905
Rheum rhabarbarum	326804	Circular	3	57	OQ754376~8
Reynoutria japonica	302229	Circular	1	48	NC_082180
Fallopia aubertii	350156	Circular	1	60	MW664926
Oxyria digyna	384115	Circular and linear	2	41
Oxyria sinensis	411437	Circular and linear	2	43

## Sheet: Table S2
Table S2: The simple sequence repeats (SSRs) SSRs in the mitochondrial genome of O. digyna chromosome 1
Mitochondrial genome	SSR nr.	SSR type	SSR	size	start	end
chromosome 1	1	p1	(A)10	10	3483	3492
O. digyna chromosome 1	13	p1	(A)10	10	201262	201271
O. digyna chromosome 1	14	p1	(A)10	10	211491	211500
O. digyna chromosome 1	2	p1	(A)11	11	11789	11799
O. digyna chromosome 1	6	p1	(A)11	11	75051	75061
O. digyna chromosome 1	11	p1	(A)12	12	156489	156500
O. digyna chromosome 1	3	p1	(C)10	10	23200	23209
O. digyna chromosome 1	10	p1	(G)11	11	118106	118116
O. digyna chromosome 1	5	p3	(GAA)5	15	58979	58993
O. digyna chromosome 1	4	p1	(T)10	10	47306	47315
O. digyna chromosome 1	7	p1	(T)10	10	89066	89075
O. digyna chromosome 1	8	p1	(T)10	10	98166	98175
O. digyna chromosome 1	9	p1	(T)10	10	106083	106092
O. digyna chromosome 1	12	p1	(T)10	10	191798	191807
O. digyna chromosome 1	16	p1	(T)10	10	268625	268634
O. digyna chromosome 1	15	p1	(T)11	11	263203	263213

## Sheet: Table S3
Table S3: The simple sequence repeats (SSRs) SSRs in the mitochondrial genome of O. digyna chromosome 2
Mitochondrial genome	SSR nr.	SSR type	SSR	size	start	end
O. digyna chromosome 2	1	p1	(A)12	12	7195	7206
O. digyna chromosome 2	2	p1	(T)10	10	7329	7338
O. digyna chromosome 2	3	p1	(T)13	13	74285	74297

## Sheet: Table S4
Table S4: The simple sequence repeats (SSRs) SSRs in the mitochondrial genome of O. sinensis chromosome 1
Mitochondrial genome	SSR nr.	SSR type	SSR	size	start	end
O. sinensi chromosome 1	1	p2	(AT)6	6	3365	3376
O. sinensi chromosome 1	2	p1	(A)11	11	5417	5427
O. sinensi chromosome 1	3	p1	(T)10	10	26890	26899
O. sinensi chromosome 1	4	p1	(A)10	10	28163	28172
O. sinensi chromosome 1	5	p2	(TC)6	6	66865	66876
O. sinensi chromosome 1	6	p1	(T)10	10	91469	91478
O. sinensi chromosome 1	7	p1	(T)13	13	128629	128641
O. sinensi chromosome 1	8	p1	(A)10	10	148756	148765
O. sinensi chromosome 1	9	p1	(T)10	10	171758	171767
O. sinensi chromosome 1	10	p1	(A)11	11	188492	188502
O. sinensi chromosome 1	11	p1	(A)10	10	189199	189208
O. sinensi chromosome 1	12	p1	(T)15	15	189320	189334
O. sinensi chromosome 1	13	p1	(A)10	10	197308	197317
O. sinensi chromosome 1	14	p1	(A)10	10	213255	213264
O. sinensi chromosome 1	15	p1	(A)10	10	219815	219824
O. sinensi chromosome 1	16	p1	(T)10	10	270551	270560
O. sinensi chromosome 1	17	p1	(T)10	10	284493	284502
O. sinensi chromosome 1	18	p1	(A)10	10	285676	285685
O. sinensi chromosome 1	19	p1	(T)10	10	285869	285878
O. sinensi chromosome 1	20	p1	(T)10	10	293974	293983
O. sinensi chromosome 1	21	p1	(T)10	10	305123	305132
O. sinensi chromosome 1	22	p1	(A)10	10	334494	334503
O. sinensi chromosome 1	23	p1	(A)10	10	341054	341063
O. sinensi chromosome 1	24	p1	(T)11	11	344003	344013
O. sinensi chromosome 1	25	p1	(A)11	11	353548	353558
O. sinensi chromosome 1	26	p1	(A)10	10	356075	356084
O. sinensi chromosome 1	27	p1	(A)12	12	359349	359360
O. sinensi chromosome 1	28	p1	(A)11	11	359884	359894

## Sheet: Table S5
Table S5: The simple sequence repeats (SSRs) SSRs in the mitochondrial genome of O.sinensis chromosome 2
ID	SSR nr.	SSR type	SSR	size	start	end
O. sinensis chromosome 2	1	p1	(C)10	10	6577	6586
O. sinensis chromosome 2	2	p1	(C)10	10	6733	6742
O. sinensis chromosome 2	3	p1	(A)10	10	25712	25721

## Sheet: Table S6
Table S6: The tandem repeat sequences in the mitochondrial genome of O. digyna chromosome 1
Indices	Period	Copy	Consensus	Percent	Percent	Score	A	C	G	T	Entropy
	Size	Number	Size	Matches	Indels						(0-2)
3203--3245	18	2.6	16	82	10	52	25	32	20	20	1.97
37111--37205	46	2.2	42	89	10	140	18	30	21	29	1.97
93536--93572	19	1.9	19	88	0	56	70	5	13	10	1.32
222344--222381	18	2.1	18	85	9	51	68	10	13	7	1.39
239442--239488	20	2.2	22	81	11	62	29	25	21	23	1.99
265617--265662	24	1.9	24	90	0	74	28	21	21	28	1.99

## Sheet: Table S7
Table S7: The tandem repeat sequences in the mitochondrial genome of O. digyna chromosome 2
Indices	Period	Copy	Consensus	Percent	Percent	Score	A	C	G	T	Entropy
	Size	Number	Size	Matches	Indels						(0-2)
40492--40526	18	1.9	18	100	0	70	22	20	17	40	1.92
55450--55492	16	2.7	16	100	0	86	44	0	18	37	1.5
69544--69619	39	1.9	39	94	0	134	22	25	21	31	1.98
71382--71435	28	1.9	28	88	0	81	25	14	25	33	1.95
80966--81008	18	2.4	18	81	18	54	18	20	25	34	1.96
83672--83766	46	2.2	41	83	16	138	29	21	30	18	1.97

## Sheet: Table S8
Table S8: The tandem repeat sequences in the mitochondrial genome of O. sinensis chromosome 1
Indices	Period	Copy	Consensus	Percent	Percent	Score	A	C	G	T	Entropy
	Size	Number	Size	Matches	Indels						(0-2)
70392--70437	24	1.9	24	90	0	74	28	21	21	28	1.99
127082--127124	18	2.4	18	81	18	54	18	20	25	34	1.96
158995--159052	27	2.2	27	96	3	109	18	36	12	32	1.88
158995--159068	27	2.8	26	87	4	76	18	37	10	32	1.86
160459--160515	25	2.3	25	96	0	105	15	36	10	36	1.82
194548--194623	39	1.9	39	94	0	134	32	19	25	22	1.97
199867--199894	12	2.3	12	100	0	56	42	7	0	50	1.3
297112--297210	30	3.3	30	92	2	155	21	15	16	47	1.82
302971--302998	12	2.3	12	100	0	56	32	17	14	35	1.9
302985--303084	18	5.6	18	78	4	67	32	26	4	38	1.75
303020--303099	18	4.4	18	78	6	90	31	27	2	38	1.7
303038--303113	36	2.1	36	85	0	98	30	27	2	39	1.7

## Sheet: Table S9
Table S9: The tandem repeat sequences in the mitochondrial genome of O. sinensis chromosome 2
Indices	Period	Copy	Consensus	Percent	Percent	Score	A	C	G	T	Entropy
	Size	Number	Size	Matches	Indels						(0-2)
6167--6202	17	2.1	17	100	0	72	41	5	22	30	1.76

[truncated: 8 more sheets: Table S10, Table S11, Table S12, Table S13, Table S14, Table S15, Table S16, Table S17]
