# Supplementary material for: Comparative Analyses of the Complete Mitogenomes of Two <em>Oxyria </em>Species (Polygonaceae) Provide Insights into Understanding the Mitogenome Evolution Within the Family
Source: Preprints.org preprint supplement (doi:10.20944/preprints202410.1049.v1), 2024-10-15
Supplement: Supplementary file 3 [file Table1.xlsx]

## Sheet: Sheet3
	TABLE 1 Gene composition of the O. digyna and O. sinensis mitogenome
	Group of genes	O. digyna mitogenome		O. sinensis mitogenome
		chromosome 1	chromosome 2	chromosome 1	chromosome 2
Core genes	Complex I (NADH dehydrogenase)	nad1, nad2, nad3, nad4*, nad5, nad4L, nad6, nad7*, nad9		nad1, nad2, nad3, nad4*, nad4L, nad5, nad6, nad7*, nad9
	Cytochrome c biogenesis	cob		cob
	Complex IV (cytochrome c oxidase)	cox1, cox2	cox3	cox1, cox2 (2) , cox3
	ATP synthase	atp4, atp6, atp9	atp1, atp8	atp1, atp4, atp6, atp8,	atp9
	Maturases	matR		matR (2)
	Cytochrome c biogenesis	ccmB, ccmC, ccmFC*, ccmFN		ccmB, ccmC, ccmFC*, ccmFN
	Transport membrane protein	mttB		mttB
Variable genes		rpl5, rpl16		rpl5, rpl16
	Ribosomal protein	rps1, rps3*, rps4, rps7, rps12, rps13 rps14		rps1, rps3*, rps4, rps7, rps12, rps13, rps14
	Complex II (succinate dehydrogenase)		sdh4	sdh4
rRNA genes	Ribosomal RNAs	rrn5, rrn18	rrn26	rrn18, rrn26, rrn5
tRNA	Transfer RNAs	trnC-GCA, trnE-CUC, trnE-UUC, trnF-GAA, trnG-GCC, trnH-GUG, trnK-UUU, trnM-CAU(5), trnN-GUU, trnP-UGG, trnQ-UUG, trnS-GCU, trnS-GGA(2), trnY-GUA	trnA-UGC, trnD-GUC, trnH-GUG, trnL-UAA, trnP-UGG, trnS-GGA, trnW-CCA	trnA-UGC, trnC-GCA, trnD-GUC, trnE-CUC, trnE-UUC, trnF-GAA, trnG-GCC, trnH-GUG, trnK-UUU, trnL-UAA, trnM-CAU(5), trnN-GUU, trnP-UGG, trnQ-UUG, trnS-GCU, trnS-GGA(2), trnV-GAC, trnW-CCA	trnE-UUC(2), trnL-CAA, trnM-CAU, trnS-GAA
	* Labeled intron containing genes, and bracketed numbers represent copy number of each gene
